# Supplementary material for: Ozone, hydrogen peroxide, and peroxymonosulfate disinfection of MS2 coliphage in water
Source: Royal Society of Chemistry journal article supplement (doi:10.1039/d3em00527e), 2024-01-01
Supplement: d3em00527e1.pdf [file d3em00527e1.pdf]

Supplementary Information for

**Ozone, hydrogen peroxide, and peroxydisulfate disinfection of MS2  
coliphage in water**

Zi-Chen Yang<sup>1</sup>, Wen-Long Wang<sup>1</sup>, Zi-Bo Jing<sup>1</sup>, Yi-Qing Jiang<sup>1</sup>, He-Qing Zhang<sup>2</sup>,

Min-Yong Lee<sup>3</sup>, Lu Peng<sup>1, \*</sup>, Qian-Yuan Wu<sup>1</sup>

1 Key Laboratory of Microorganism Application and Risk Control of Shenzhen,  
Guangdong Provincial Engineering Research Center for Urban Water Recycling and  
Environmental Safety, Institute of Environment and Ecology, Tsinghua Shenzhen  
International Graduate School, Tsinghua University, Shenzhen 518055, China

2 CSCEC Scimee Sci.&Tech. Co., Ltd., Beijing 100084, PR China

3 National Institute of Environment Research, Ministry of Environment, Incheon  
22689, Republic of Korea

\*Corresponding author.

Lu Peng

Institute of Environment and Ecology, Tsinghua Shenzhen International Graduate  
School, Tsinghua University, Shenzhen 518055, China, [penglu@sz.tsinghua.edu.cn](mailto:penglu@sz.tsinghua.edu.cn)

---

Number of pages: 11 (including cover sheet)

Number of texts: 1

Number of tables: 4

Number of figures: 2

---

|                                                                                         |    |
|-----------------------------------------------------------------------------------------|----|
| <b>Text S1.</b> The oxidant demand of the disinfection system.....                      | 4  |
| <b>Table S1.</b> The component list of Coliphage MS2 liquid medium.....                 | 5  |
| <b>Table S2.</b> Water quality parameters of the secondary effluent .....               | 6  |
| <b>Table S3.</b> Five regions and typical organics of EEM.....                          | 7  |
| <b>Table S4.</b> The disinfection performance of oxidants in different conditions ..... | 8  |
| <b>Figure S1.</b> The decay of oxidants within 30 min in the DI water .....             | 9  |
| <b>Figure S2.</b> The decay of oxidants within 30 min in the secondary effluent.....    | 10 |
| <b>Reference</b> .....                                                                  | 11 |

---

**Text S1.** The oxidant demand of the disinfection system

0.1 mM, 1 mM PMS, and 50 mM H<sub>2</sub>O<sub>2</sub> were respectively added into the disinfection system without MS2 coliphage (5 mM PBS and coliphage MS2 liquid medium), The concentration of oxidants did not change significantly. The nutrient composition of the coliphage MS2 liquid medium was shown in Table.S1, and it was thousand-fold diluted before the oxidant was added (the diluted concentration: <10.0 mg/L tryptone, <10.0 mg/L yeast extract, <8.0 mg/L sodium chloride).

---

**Table S1.** The component list of Coliphage MS2 liquid medium

| <b>Tutrition</b> | <b>Concentration (g/L)</b> |
|------------------|----------------------------|
| tryptone         | 10.0                       |
| yeast extract    | 1.0                        |
| sodium chloride  | 8.0                        |

---

---

**Table S2.** Water quality parameters of the secondary effluent

| <b>pH</b> | <b>TOC (mg-C/L)</b> | <b>NH<sub>3</sub>-N(mg/L)</b> | <b>Turbidity (NTU)</b> |
|-----------|---------------------|-------------------------------|------------------------|
| 7.92      | 6.650               | 0.22                          | 3.19                   |

---

**Table S3.** Five regions and typical organics of EEM<sup>[1]</sup>

| <b>Emission<br/>(nm)</b> | <b>Excitation<br/>(nm)</b> | <b>Region</b> | <b>Typical organics</b>       |
|--------------------------|----------------------------|---------------|-------------------------------|
| 220-250                  | 280-330                    | I             | Aromatic protein I            |
| 220-250                  | 330-380                    | II            | Aromatic protein II           |
| 220-250                  | 380-500                    | III           | Fulvic acid-like materials    |
| 250-280                  | 280-380                    | IV            | Soluble microbial metabolites |
| 250-400                  | 380-500                    | V             | Humic acid-like organics      |

---

**Table S4.** The disinfection performance of oxidants in different conditions

| Disinfectant                  | Water              | Dose (mM)       | Time (min) | Log(N/N <sub>0</sub> ) |
|-------------------------------|--------------------|-----------------|------------|------------------------|
| O <sub>3</sub>                | Ultrapure Water    | 0.005           | 30         | 0.89±0.06              |
|                               | Ultrapure Water    | 0.03            | 30         | 1.25±0.11              |
|                               | Ultrapure Water    | 0.05            | 30         | 3.90±0.02              |
|                               | Ultrapure Water    | 0.1             | 0.5        | 4.59±0.29              |
|                               | Ultrapure Water    | 0.1             | 1          | 4.51±0.12              |
|                               | Ultrapure Water    | 0.1             | 3          | 4.55±0.40              |
|                               | Ultrapure Water    | 0.1             | 5          | 4.36±0.13              |
|                               | Ultrapure Water    | 0.1             | 10         | 4.41±0.09              |
|                               | Ultrapure Water    | 0.1             | 15         | 5.10±0.10              |
|                               | Ultrapure Water    | 0.1             | 30         | 5.21±0.38              |
|                               | Secondary Effluent | 0.1             | 30         | 4.32±0.24              |
|                               | Ultrapure Water    | 0.25            | 30         | 6.88                   |
|                               | PMS                | Ultrapure Water | 0.01       | 30                     |
| Ultrapure Water               |                    | 0.1             | 30         | 1.94±0.14              |
| Ultrapure Water               |                    | 0.25            | 30         | 2.25±0.11              |
| Ultrapure Water               |                    | 1               | 30         | 4.30±0.02              |
| Ultrapure Water               |                    | 1               | 0.5        | 1.84±0.04              |
| Ultrapure Water               |                    | 1               | 1          | 1.85±0.05              |
| Ultrapure Water               |                    | 1               | 3          | 1.98±0.04              |
| Ultrapure Water               |                    | 1               | 5          | 2.23±0.10              |
| Ultrapure Water               |                    | 1               | 10         | 3.14±0.11              |
| Ultrapure Water               |                    | 1               | 15         | 3.46±0.02              |
| Ultrapure Water               |                    | 1               | 30         | 5.01±0.21              |
| Ultrapure Water               |                    | 1               | 30         | 5.13±0.17              |
| Secondary Effluent            |                    | 1               | 30         | 4.44±0.21              |
| Ultrapure Water               |                    | 2.5             | 30         | 6.29±0.71              |
| H <sub>2</sub> O <sub>2</sub> | Ultrapure Water    | 1               | 30         | 0.76±0.02              |
|                               | Ultrapure Water    | 2.5             | 30         | 1.09±0.01              |
|                               | Ultrapure Water    | 5               | 30         | 2.35±0.12              |
|                               | Ultrapure Water    | 10              | 30         | 2.95±0.01              |
|                               | Ultrapure Water    | 25              | 30         | 4.48±0.12              |
|                               | Ultrapure Water    | 50              | 0.5        | 3.20±0.03              |
|                               | Ultrapure Water    | 50              | 1          | 3.27±0.14              |
|                               | Ultrapure Water    | 50              | 3          | 4.61±0.36              |
|                               | Ultrapure Water    | 50              | 5          | 4.83±0.16              |
|                               | Ultrapure Water    | 50              | 10         | 4.87±0.25              |
|                               | Ultrapure Water    | 50              | 15         | 5.21±0.06              |
|                               | Ultrapure Water    | 50              | 30         | 5.36±0.22              |
|                               | Secondary Effluent | 50              | 30         | 4.04±0.16              |
|                               | Ultrapure Water    | 100             | 30         | 6.12±0.71              |



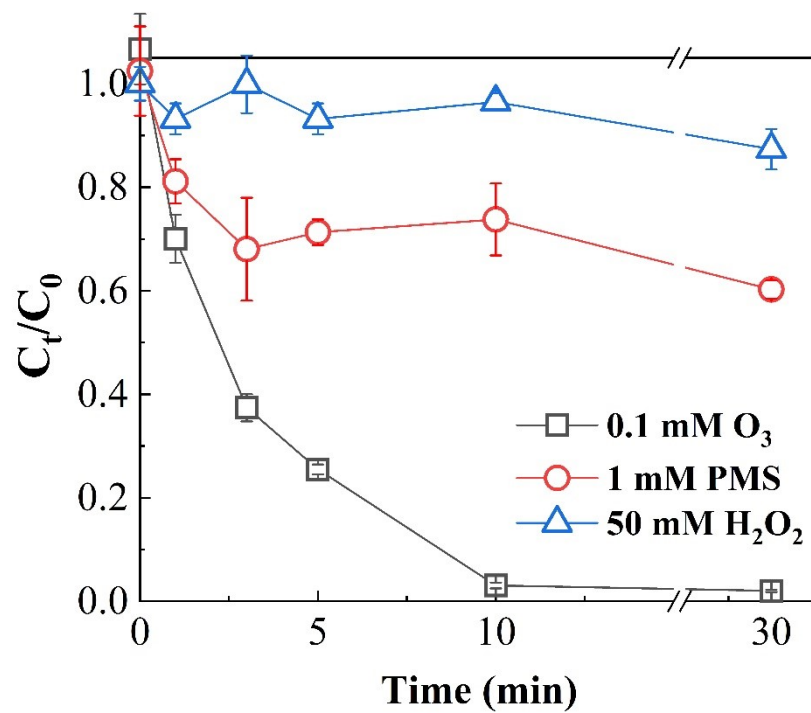

Figure S1. The decay of oxidants within 30 min in the DI water

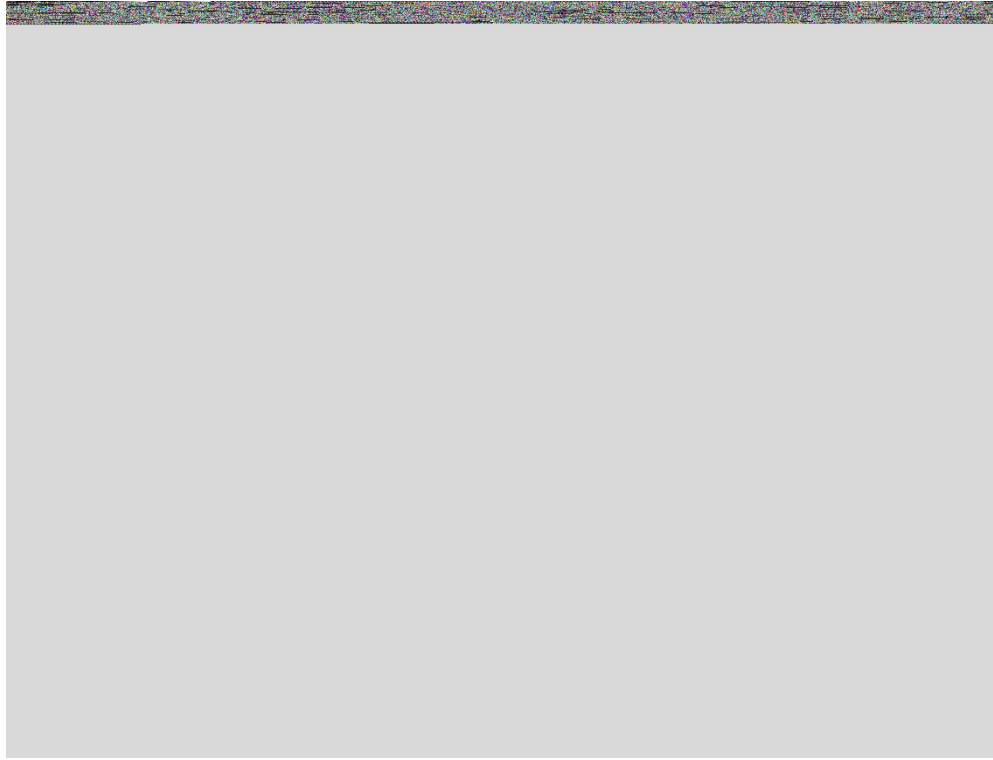

**Figure S2. The decay of oxidants within 30 min in the secondary effluent**

---

## Reference

- [1] Chen, W., Westerhoff, P., Leenheer, J.A. and Booksh, K. 2003. Fluorescence Excitation–Emission Matrix Regional Integration to Quantify Spectra for Dissolved Organic Matter. *Environmental Science & Technology* 37(24), 5701-5710.
